# Supplementary material for: Surgical Prehabilitation in Patients with Gastrointestinal Cancers: Impact of Unimodal and Multimodal Programs on Postoperative Outcomes and Prospects for New Therapeutic Strategies—A Systematic Review
Source: MDPI journal article supplement (doi:10.3390/cancers15061881), 2023-03-21
Supplement: s1 [file s1]

**Table S1. Main population characteristics**

| Studies                                | Country | Tumor stages and characteristics                                                                                             | Malnutrition risk | Sex (♀) | Age (years)                     | BMI (kg/m <sup>2</sup> )      | Neoadjuvant treatment and type of surgery                                                                     | Surgical approaches                                        | Operative time (mins)               | Length of stay (days)           |
|----------------------------------------|---------|------------------------------------------------------------------------------------------------------------------------------|-------------------|---------|---------------------------------|-------------------------------|---------------------------------------------------------------------------------------------------------------|------------------------------------------------------------|-------------------------------------|---------------------------------|
| <b>Nutritional interventions</b>       |         |                                                                                                                              |                   |         |                                 |                               |                                                                                                               |                                                            |                                     |                                 |
| He 2022<br>n=67<br>[25]                | CN      | Stages II, III, IV<br>- Antrum 53%<br>- Gastric body 32%<br>- Esophagogastric junction 15%                                   | 86% <sup>a</sup>  | 29%     | INT: 63.2±12.0<br>CO: 60.5±9.4  | INT: 22.0±3.0<br>CO: 23.1±2.4 | Gastrectomy:<br>- Distal subtotal 62%<br>- Total 33%<br>- Proximal subtotal 5%                                | -                                                          | INT: 207.0±33.1<br>CO: 203.3±41.1   | -                               |
| Tesar 2022<br>n=120<br>[26]            | CZ      | Stages I, II, III<br>- Rectum 40%<br>- Right colon 36%<br>- Left colon 24%                                                   | 29% <sup>a</sup>  | 34%     | INT: 67.5±10.0<br>CO: 63.1±12.5 | INT: 27.2±4.8<br>CO: 26.0±5.8 | -                                                                                                             | - Laparoscopy 76%<br>- Open 24%                            | -                                   | INT: 10.9±9.0<br>CO: 11.2±8.0   |
| Lee 2021<br>n=176<br>[27]              | KOR     | Stages I, II, III, IV<br>- Left colon 62%<br>- Right colon 38%                                                               | 16% <sup>a</sup>  | 34%     | INT: 65.3±9.2<br>CO: 65.3±11.7  | INT: 24.4±3.5<br>CO: 24.1±4.1 | - Anterior resection 60%<br>- Right hemicolectomy 33%<br>- Left hemicolectomy 5%<br>- Transverse colectomy 2% | - Laparoscopy 98%<br>- Conversion to open 2%               | -                                   | INT: 7.6±2.5<br>CO: 7.4±2.3     |
| Okabayashi 2020<br>n=208<br>[28]       | JP      | Stages not mentioned<br>- Hepatocellular carcinoma 91%<br>- Intrahepatic cholangiocellular carcinoma 9%                      | -                 | 31%     | INT: 73.0±10.7<br>CO: 73.0±9.8  | -                             | Hepatic resection:<br>- Subsegment 52%<br>- 1 segment 33%<br>- ≥2 segments 15%,                               | -                                                          | INT: 179[43-527]<br>CO: 167[57-519] | INT: 10[7-157]<br>CO: 12[5-144] |
| Ashida 2019<br>n=24<br>[29]            | JP      | Stages not mentioned<br>- Bile duct carcinoma 35%<br>- Ampullary carcinoma 20%<br>- Pancreatic carcinoma 15%<br>- Others 25% | -                 | 45%     | INT: 64.0±11.0<br>CO: 69.0±6.0  | INT: 22.3±4.6<br>CO: 21.4±2.5 | - Whipple 100%                                                                                                | - Open 100%                                                | INT: 414.0±121.0<br>CO: 490.0±153.0 | -                               |
| <b>Physical activity interventions</b> |         |                                                                                                                              |                   |         |                                 |                               |                                                                                                               |                                                            |                                     |                                 |
| Berkel 2022<br>n=74<br>[30]            | NL      | Stages not mentioned<br>- Colon 95%,<br>- Rectum 5%                                                                          | - <sup>b</sup>    | 47%     | INT: 74.0±7.0<br>CO: 73.0±6.0   | INT: 29.8±4.1<br>CO: 30.5±4.9 | NAT: 5%<br>- Right hemicolectomy 47%<br>- Sigmoid colectomy 32%                                               | - Laparoscopy 77%<br>- Conversion to open 19%<br>- Open 4% | -                                   | INT: 8.4±7.4<br>CO: 9.1±7.0     |

|                                                        |     |                                                                                                                                                                          |                                 |     |                                 |                               |                                                                                                                             |                                   |                                                                                           |                                 |  |
|--------------------------------------------------------|-----|--------------------------------------------------------------------------------------------------------------------------------------------------------------------------|---------------------------------|-----|---------------------------------|-------------------------------|-----------------------------------------------------------------------------------------------------------------------------|-----------------------------------|-------------------------------------------------------------------------------------------|---------------------------------|--|
|                                                        |     |                                                                                                                                                                          |                                 |     |                                 |                               |                                                                                                                             | - Left hemicolectomy 9%           |                                                                                           |                                 |  |
|                                                        |     |                                                                                                                                                                          |                                 |     |                                 |                               |                                                                                                                             | - Transverse hemicolectomy 3%     |                                                                                           |                                 |  |
|                                                        |     |                                                                                                                                                                          |                                 |     |                                 |                               |                                                                                                                             | - Abdominal perineal resection 2% |                                                                                           |                                 |  |
|                                                        |     |                                                                                                                                                                          |                                 |     |                                 |                               |                                                                                                                             | - Low anterior resection 2%       |                                                                                           |                                 |  |
|                                                        |     |                                                                                                                                                                          |                                 |     |                                 |                               |                                                                                                                             | - Subtotal colectomy 2%           |                                                                                           |                                 |  |
|                                                        |     |                                                                                                                                                                          |                                 |     |                                 |                               |                                                                                                                             | - Other 3%                        |                                                                                           |                                 |  |
| Steffens 2021<br>n=22<br>[31]                          | AUS | Stages not mentioned<br>- Primary rectal 14%<br>- Recurrent rectal 32%<br>- Appendix adenocarcinoma 27%<br>- Pseudomyxoma peritonei 14%<br>- Colorectal 9%<br>- Other 4% | -                               | 46% | INT: 62[48-72]<br>CO: 66[46-70] | -                             | NAT: 17%<br>- Pelvic exenteration 50%<br>- Cytoreductive surgery & hyperthermic intraperitoneal chemotherapy 50%            | - Open 100%                       | -                                                                                         | INT: 36[15-52]<br>CO: 29[15-53] |  |
| Karlsson 2019<br>n=23<br>[32]                          | SE  | Stages I, II, III, IV<br>- Colon 86%<br>- Rectum 14%                                                                                                                     | -                               | 62% | INT: 83[76-85]<br>CO: 74[73-76] | -                             | NAT: 14%<br>No information on type of surgery                                                                               | - Laparoscopy 71%<br>- Open 29%   | INT: colon 150[140-164]<br>rectum 401[-]<br>CO: colon 159[145-176]<br>rectum 529[441-616] | INT: 5[4-6]<br>CO: 6[4-7]       |  |
| <b>Probiotics and symbiotics interventions</b>         |     |                                                                                                                                                                          |                                 |     |                                 |                               |                                                                                                                             |                                   |                                                                                           |                                 |  |
| Roussel 2022<br>n=54<br>[33]                           | FR  | Stages not mentioned<br>- Hepatocellular carcinoma 100%                                                                                                                  | -                               | 15% | INT: 66.0±8.9<br>CO: 66.9±6.7   | -                             | NAT: 11%<br>- Minor liver resection 93%<br>- Major liver resection 7%                                                       | -                                 | INT: 130[40-400]<br>CO: 100[40-290]                                                       | -                               |  |
| Polakowski 2019<br>n=120<br>[34]                       | BR  | Stages I, II, III                                                                                                                                                        | -                               | 47% | INT: 60.9±6.7<br>CO: 58.9±6.3   | INT: 24.8±3.2<br>CO: 24.9±2.9 | NAT: 0%<br>- Abdominal rectosigmoidectomy 49%<br>- Rectosigmoidectomy with colostomy /ileostomy 44%<br>- Right colectomy 7% | -                                 | -                                                                                         | INT: 3.0±1.0<br>CO: 4.0±18.0    |  |
| <b>Nutritional and physical activity interventions</b> |     |                                                                                                                                                                          |                                 |     |                                 |                               |                                                                                                                             |                                   |                                                                                           |                                 |  |
| Ausania 2019<br>n=40                                   | ES  | Stages not mentioned<br>- Ductal carcinoma 45%                                                                                                                           | INT: 100% <sup>c</sup><br>CO: - | 45% | INT: 66[38-80]<br>CO: 66[38-81] | INT: 24.8[-]<br>CO: 26.5[-]   | - Whipple 100%                                                                                                              | - Open 100%                       | -                                                                                         | INT: 11[7-46]<br>CO: 13[7-60]   |  |

|                                  |    |                                                                                                                                |                  |     |                                    |                                    |                                                                                                                                                                                                                                                                                              |                                 |                                          |                               |
|----------------------------------|----|--------------------------------------------------------------------------------------------------------------------------------|------------------|-----|------------------------------------|------------------------------------|----------------------------------------------------------------------------------------------------------------------------------------------------------------------------------------------------------------------------------------------------------------------------------------------|---------------------------------|------------------------------------------|-------------------------------|
| [35]                             |    | - Ampullary carcinoma<br>40%<br>- Cholangiocarcinoma<br>7.5%<br>- Intraductal papillary<br>mucinous neoplasm<br>carcinoma 7.5% |                  |     |                                    |                                    |                                                                                                                                                                                                                                                                                              |                                 |                                          |                               |
| Minnella<br>2018<br>n=68<br>[36] | CA | Stages I, II, III<br>- Esophagus 80%,<br>- Gastric 20%                                                                         | 16% <sup>a</sup> | 25% | INT: 67.3±7.4<br>CO: 68.0±11.6     | INT: 26.1±4.8<br>CO: 25.7±4.7      | NAT: 69%<br>- Esophagectomy 80%<br>- Partial gastrectomy<br>12%<br>- Total gastrectomy 8%                                                                                                                                                                                                    | - Open 57%<br>- Laparoscopy 43% | INT: 195[170-226]<br>CO: 226[179-315]    | INT: 8[6-12]<br>CO: 7[6-13]   |
| <b>Multimodal interventions</b>  |    |                                                                                                                                |                  |     |                                    |                                    |                                                                                                                                                                                                                                                                                              |                                 |                                          |                               |
| Allen<br>2022<br>n=54<br>[37]    | UK | Stages I, II, III, IV                                                                                                          | -                | 15% | INT: 65.0±6.0<br>CO: 62.0±9.0      | INT: 28.1±4.8<br>CO: 27.7±5.1      | NAT: 100%<br>- Open esophagectomy<br>84%<br>- Total gastrectomy 11%<br>- Resection abandoned<br>5%                                                                                                                                                                                           | -                               | INT: 515[429-528]<br>CO: 475[431-536]    | INT: 11[9-21]<br>CO: 16[9-33] |
| Carli<br>2020<br>n=120<br>[38]   | CA | Stages I, II, III, IV<br>- Colon 72%<br>- Rectum 28%                                                                           | 64% <sup>d</sup> | 53% | INT1: 78[72-82]<br>INT2: 82[74-84] | INT1: 25[23-30]<br>INT2: 26[24-31] | NAT: 12%<br>- Right hemicolectomy<br>42%<br>- Low anterior resection<br>15%<br>- Anterior/sigmoid<br>resection 14%<br>- Left hemicolectomy<br>12%<br>- Abdominoperineal<br>resection 7%<br>- Ileocecal resection 3%<br>- Subtotal colectomy 3%<br>- Transverse colectomy<br>2%<br>- Other 2% | - Laparoscopy 79%<br>- Open 21% | INT1: 180[110-280]<br>INT2: 180[130-300] | INT1: 4[3-8]<br>INT2: 5[3-9]  |
| Minnella<br>2020<br>n=42<br>[39] | CA | Stages I, II, III<br>- Colon 74%,<br>- Rectum 26%                                                                              | 41% <sup>c</sup> | 38% | INT1: 67[60-72]<br>INT2: 67[50-76] | INT1: 29[23-32]<br>INT2: 26[23-34] | NAT: 19%<br>No information type of<br>surgery                                                                                                                                                                                                                                                | - Laparoscopy<br>100%           | INT1: 183.5±51.4<br>INT2: 216.7±52.4     | INT1: 4[3-6]<br>INT2: 4[3-5]  |

Results are presented as mean±SD, median[IQR]; <sup>a</sup> Nutritional Risk Screening (NRS), <sup>b</sup> Short Nutritional Appetite Questionnaire (SNAQ), <sup>c</sup> Patient-Generated Subjective Global Assessment (PG-SGA), <sup>d</sup> Subjective Global Assessment (SGA)

**Abbreviations:** -: no data, BMI: Body mass index, CN: China, CZ: Czech Republic, KOR: South Korea, JP: Japan, NL: Netherlands, AUS: Australia, SE: Sweden, FR: France, BR: Brazil, ES: Spain, CA: Canada, UK: United Kingdom, INT: Intervention group, CO: Control group, INT1: Intervention N°1, INT2: Intervention N°2, NAT: Neoadjuvant treatment
